# Supplementary material for: Simulating the Mammalian Blastocyst - Molecular and Mechanical Interactions Pattern the Embryo
Source: PubMed Central journal article supplement (PMC3088645; doi:10.1371/journal.pcbi.1001128), 2011-05-05
Supplement: pcbi.1001128.s002.pdf [file pcbi.1001128.s002.pdf]

**CDX2 mRNA**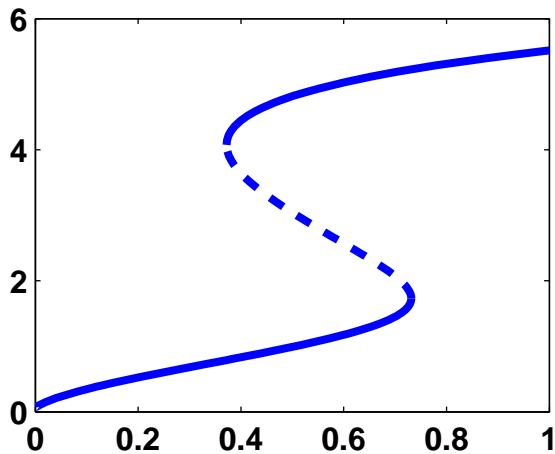**OCT4 mRNA**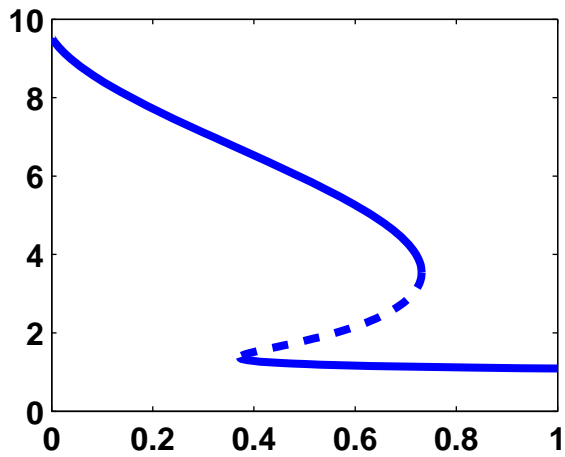**CDX2 Protein**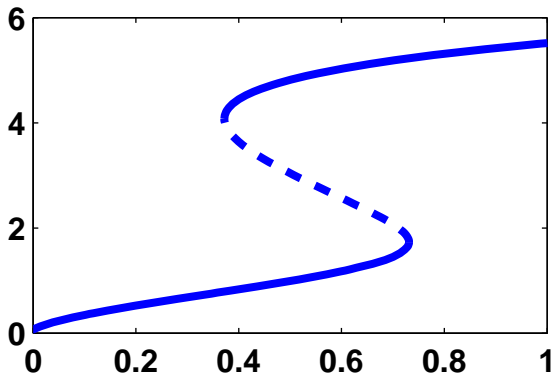**OCT4 Protein**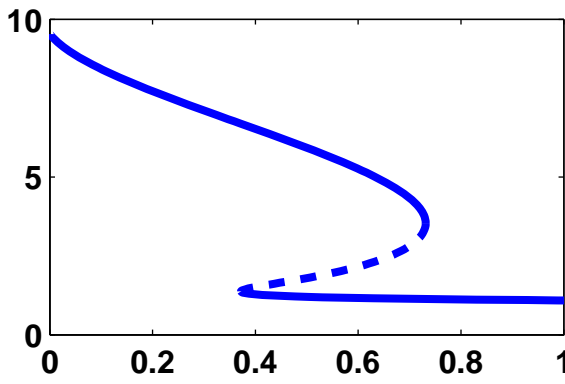**Polarity signal P****Concentration A.U**
