# Supplementary material for: Simulating the Mammalian Blastocyst - Molecular and Mechanical Interactions Pattern the Embryo
Source: PubMed Central journal article supplement (PMC3088645; doi:10.1371/journal.pcbi.1001128), 2011-05-05

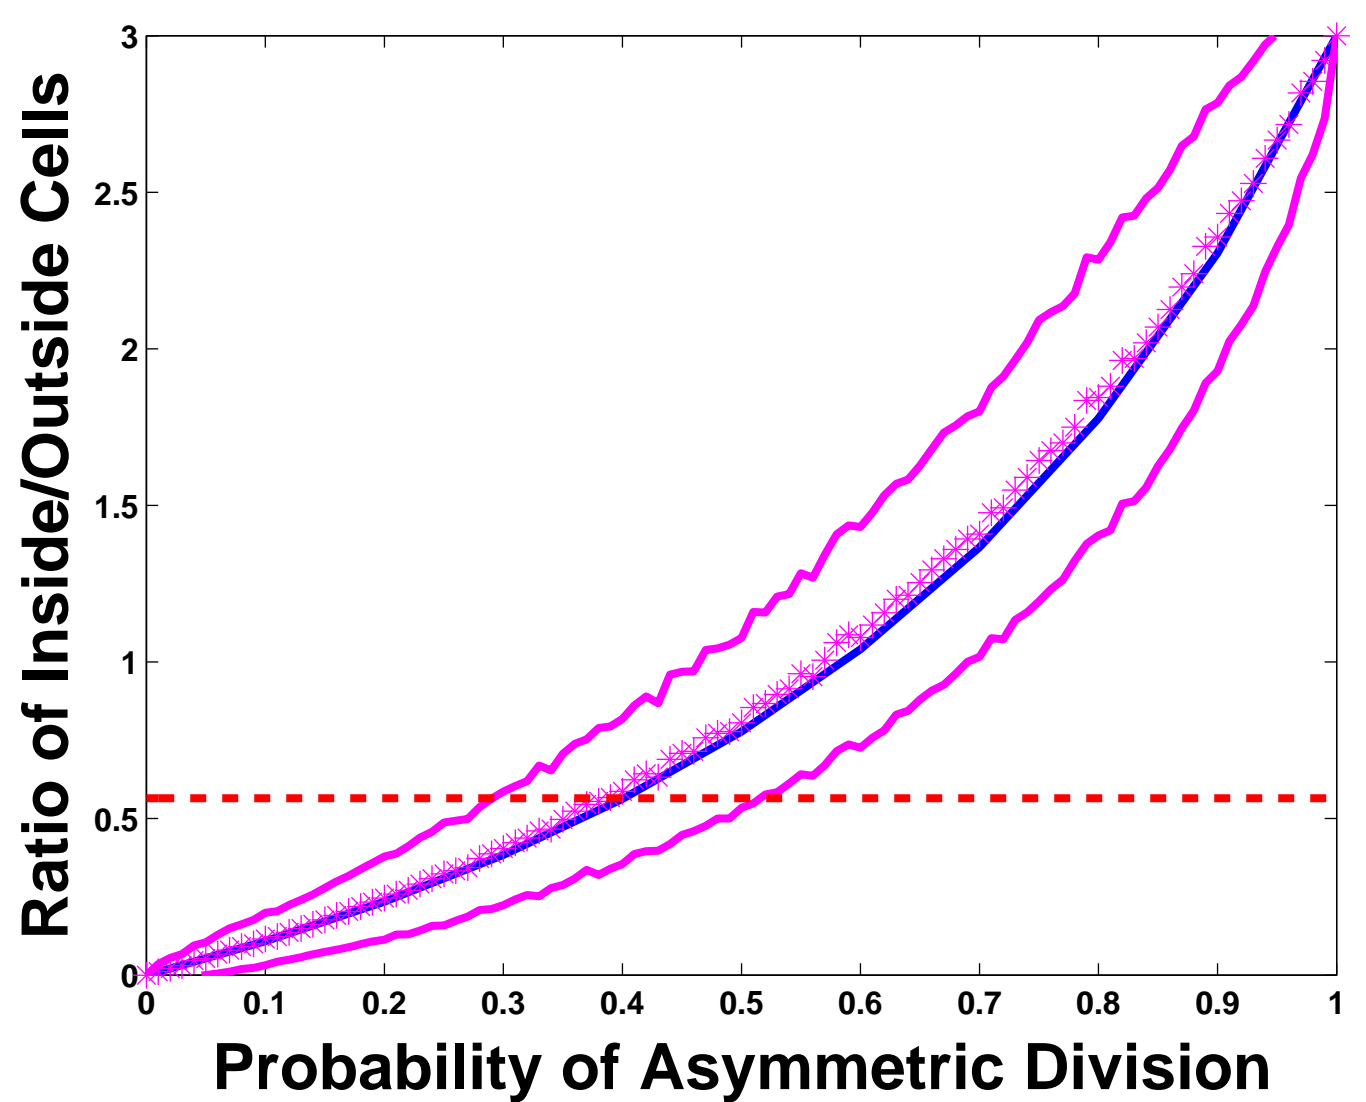

Supplement: pcbi.1001128.s006.pdf [file pcbi.1001128.s006.pdf]
