# Supplementary material for: Simulating the Mammalian Blastocyst - Molecular and Mechanical Interactions Pattern the Embryo
Source: PubMed Central journal article supplement (PMC3088645; doi:10.1371/journal.pcbi.1001128), 2011-05-05
Supplement: pcbi.1001128.s007.pdf [file pcbi.1001128.s007.pdf]

**Supplementary table S1**

|                                                       |           |
|-------------------------------------------------------|-----------|
| zygote diameter - $d$ [ $\mu m$ ]                     | 70 -130   |
| cell elasticity - $k$ [ $nN/\mu m$ ]                  | 5 - 20    |
| cell adhesion - $\alpha$ [ $\mu N$ ]                  | 0 - 10    |
| active forces - $F_{act}$ [ $\mu N$ ]                 | 1 - 8     |
| blastocoelic forces - $F_{press}$ [ $\mu N$ ]         | 1 - 5     |
| random force frequency - $f$ [1/cell cycle]           | 10 - 200  |
| effective viscosity - $\mu$ [ $\mu N \cdot s/\mu m$ ] | 0.1 - 0.2 |

Table S1: The ranges of the mechanical parameters used in the simulations.
