# Supplementary material for: Simulating the Mammalian Blastocyst - Molecular and Mechanical Interactions Pattern the Embryo
Source: PubMed Central journal article supplement (PMC3088645; doi:10.1371/journal.pcbi.1001128), 2011-05-05
Supplement: pcbi.1001128.s008.pdf [file pcbi.1001128.s008.pdf]

**Supplementary table S2**

| cell type   | sample size |        | average |        | median |        | 1 <sup>st</sup> quartile |        | 3 <sup>rd</sup> quartile |        |
|-------------|-------------|--------|---------|--------|--------|--------|--------------------------|--------|--------------------------|--------|
|             | polar.      | posit. | polar.  | posit. | polar. | posit. | polar.                   | posit. | polar.                   | posit. |
| inner cells | 1004        | 948    | 1.03    | 0.87   | 0.8    | 0.6    | 0.8                      | 0.57   | 0.8                      | 0.79   |
| outer cells | 2196        | 2252   | 4.15    | 3.96   | 5.23   | 4.08   | 2.61                     | 3.82   | 5.23                     | 4.32   |

Table S2: Statistics of CDX2 expression in simulations of trophoderm specification in cell polarity-based (gray columns) and position-based (white columns) models from 100 simulations.
