# Supplementary material for: Simulating the Mammalian Blastocyst - Molecular and Mechanical Interactions Pattern the Embryo
Source: PubMed Central journal article supplement (PMC3088645; doi:10.1371/journal.pcbi.1001128), 2011-05-05
Supplement: pcbi.1001128.s009.pdf [file pcbi.1001128.s009.pdf]

**Supplementary table S3**

| $F$ | $a_0$ | $a_1$ | $a_2$ | $a_3$ | $b_0$ | $b_1$ | $b_2$ | $n_1$ | $n_2$      | $T$ | $\gamma_1$ | $\gamma_2$ |
|-----|-------|-------|-------|-------|-------|-------|-------|-------|------------|-----|------------|------------|
| 10  | 0.01  | 0.25  | 1     | 1     | 0.5   | 0.25  | 1     | 2     | 1          | 20  | 1          | 20         |
|     |       |       |       |       |       |       |       | $P$   | $\tau$     |     |            |            |
|     |       |       |       |       |       |       |       | 0.2   | inner cell | 150 |            |            |
|     |       |       |       |       |       |       |       | 1     | outer cell |     |            |            |

Table S3: Parameters used in the simulations of the gene network in the position-based trophoctoderm formation model. The parameters in the top table are the same as in polarity-based model.
