# Supplementary material for: Simulating the Mammalian Blastocyst - Molecular and Mechanical Interactions Pattern the Embryo
Source: PubMed Central journal article supplement (PMC3088645; doi:10.1371/journal.pcbi.1001128), 2011-05-05
Supplement: pcbi.1001128.s010.pdf [file pcbi.1001128.s010.pdf]

**Supplementary table S4**

|     |       |       |       |       |       |       |       |            |       |        |            |            |
|-----|-------|-------|-------|-------|-------|-------|-------|------------|-------|--------|------------|------------|
| $F$ | $a_0$ | $a_1$ | $a_2$ | $a_3$ | $b_0$ | $b_1$ | $b_2$ | $n_1$      | $n_2$ | $T$    | $\gamma_1$ | $\gamma_2$ |
| 10  | 0.01  | 0.25  | 1     | 1     | 0.5   | 0.25  | 1     | 2          | 1     | 20     | 1          | 20         |
|     |       |       |       |       |       |       | $P$   |            |       | $\tau$ |            |            |
|     |       |       |       |       |       |       | 0.36  | inner cell |       | 30     |            |            |
|     |       |       |       |       |       |       | 0.73  | outer cell |       |        |            |            |

Table S4: Parameters used in the simulations of the gene network in the polarity-based trophectoderm formation model.
